# Supplementary material
Source: publisher figshare collection journal article supplement (https://rs.figshare.com/ndownloader/files/26051597)
Supplement: Supplementary file 1 [file 26051597]

## Sheet: Size_data
Native biodiversity collapse in the Eastern Mediterranean
Size data and literature references
Paolo G. Albano1, Jan Steger1, Marija Bošnjak1,2, Beata Dunne1, Zara Guifarro1, Elina Turapova1, Quan Hua3, Darrell S. Kaufman4, Gil Rilov5, Martin Zuschin1
1 Department of Paleontology, University of Vienna, Althanstrasse 14, 1090 Vienna, Austria
2 Croatian Natural History Museum, Demetrova 1, Zagreb, Croatia
3 Australian Nuclear Science and Technology Organisation, Kirrawee DC, NSW 2232, Australia
4 School of Earth and Sustainability, Northern Arizona University, Flagstaff, Arizona 86011 USA
5 National Institute of Oceanography, Israel Oceanographic and Limnological Research (IOLR), Haifa 3108001, Israel
ID	Code	Class	Family	Genus	Species	Author	n	Substrate	Depth	Group	Component	Max_sizeL	Max_sizeLit	SourceLit
88	B001	Bivalvia	Mactridae	Mactra	lilacea	Lamarck, 1818	120	Soft	Shallow	Shallow_soft	NIS	29.9	34.7	Mienis, 2002
89	B002	Bivalvia	Donacidae	Donax	spp. (venustus and semistriatus)		30	Soft	Shallow	Shallow_soft	Native	9.49	25	Cachia et al, 2004
1	B005	Bivalvia	Semelidae	Abra	alba	(W. Wood, 1802)	62	Hard	Shallow	Shallow_hard	Native	5.634	12	Cachia et al, 2004
93	B006	Bivalvia	Thraciidae	Thracia	phaseolina	(Lamarck, 1818)	10	Soft	Shallow	Shallow_soft	Native	6.224	25	Cachia et al, 2004
94	B007	Bivalvia	Ungulinidae	Transkeia	bogii	van Aartsen, 2004	90	Soft	Shallow	Shallow_soft	NIS	6.051	10	Bogi & Galil, 1999
98	B014	Bivalvia	Lasaeidae	Tellimya	ferruginosa	(Montagu, 1808)	13	Soft	Shallow	Shallow_soft	Native	2.687	7	Cachia et al, 2004
2	B019	Bivalvia	Veneridae	Venus	verrucosa	Linnaeus, 1758	71	Hard	Shallow	Shallow_hard	Native	9.252	60	Cachia et al, 2004
100	B020	Bivalvia	Lucinidae	Loripes	orbiculatus	Poli, 1791	19	Soft	Shallow	Shallow_soft	Native	2.502	26	Cachia et al, 2004
101	B023	Bivalvia	Lucinidae	Lucinella	divaricata	(Linnaeus, 1758)	86	Soft	Shallow	Shallow_soft	Native	2.17	9	Cachia et al, 2004
3	B029	Bivalvia	Gastrochaenidae	Cucurbitula	cymbium	(Spengler, 1783)	25	Hard	Shallow	Shallow_hard	NIS	3.337	11.1	Steinhardt Museum of Natural History TAU 72455 Haifa Bay
5	B033	Bivalvia	Mytilidae	Musculus	subpictus	(Cantraine, 1835)	54	Hard	Shallow	Shallow_hard	Native	5.267	15	Cachia et al, 2004
7	B055	Bivalvia	Noetiidae	Striarca	lactea	(Linnaeus, 1758)	188	Hard	Shallow	Shallow_hard	Native	11.903	15	Cachia et al, 2004
10	B060	Bivalvia	Mytilidae	Gregariella	semigranata	(Reeve, 1858)	154	Hard	Shallow	Shallow_hard	Native	2.785	12	Cachia et al, 2004
14	B061	Bivalvia	Myidae	Sphenia	binghami	Turton, 1822	124	Hard	Shallow	Shallow_hard	Native	5.222	8	Cachia et al, 2004
16	B074	Bivalvia	Cardiidae	Papillicardium	papillosum	(Poli, 1791)	11	Hard	Shallow	Shallow_hard	Native	2.649	15	Cachia et al, 2004
111	B079	Bivalvia	Veneridae	Paratapes	textilis	(Gmelin, 1791)	17	Soft	Shallow	Shallow_soft	NIS	5.018	44.2	Steinhardt Museum of Natural History TAU 39625 Bat Yam
17	B088	Bivalvia	Lucinidae	Ctena	decussata	(O.G. Costa, 1829)	11	Hard	Shallow	Shallow_hard	Native	4.331	18	Cachia et al, 2004
90	B094	Bivalvia	Veneridae	Gouldiopa	consternans	(Oliver & Zuschin, 2001)	79	Soft	Shallow	Shallow_soft	NIS	2.065	2.5	van Aartsen et al, 2015
113	B118	Bivalvia	Veneridae	Timoclea	ovata	(Pennant, 1777)	10	Soft	Shallow	Shallow_soft	Native	1.817	10	Cachia et al, 2004
156	B124	Bivalvia	Mytilidae	Brachidontes	pharaonis	(P. Fischer, 1870)	15	Hard	Intertidal	Intertidal_hard	NIS	8.556	32.9	National Natural History Collections of the Hebrew University of Jerusalem HUJ 9274 Tantura
18	B124	Bivalvia	Mytilidae	Brachidontes	pharaonis	(P. Fischer, 1870)	44	Hard	Shallow	Shallow_hard	NIS	7.218	32.9	National Natural History Collections of the Hebrew University of Jerusalem HUJ 9274 Tantura
155	B125	Bivalvia	Mytilidae	Musculus	costulatus	(Risso, 1826)	12	Hard	Intertidal	Intertidal_hard	Native	6.38	12	Cachia et al, 2004
19	B125	Bivalvia	Mytilidae	Musculus	costulatus	(Risso, 1826)	66	Hard	Shallow	Shallow_hard	Native	5.972	12	Cachia et al, 2004
20	B132	Bivalvia	Mytilidae	Septifer	cumingii	Récluz, 1848	136	Hard	Shallow	Shallow_hard	NIS	7.611	11.2	Steinhardt Museum of Natural History TAU 77802 Haifa Bay
23	B154	Bivalvia	Limidae	Limaria	hians	(Gmelin, 1791)	19	Hard	Shallow	Shallow_hard	Native	3.886	20	Cachia et al, 2004
24	B163	Bivalvia	Cardiidae	Afrocardium	richardi	(Audouin, 1826)	15	Hard	Shallow	Shallow_hard	NIS	2.309	9	Bogi & Galil, 1999
25	B191	Bivalvia	Ostreidae	Alectryonella	plicatula	(Gmelin, 1791)	92	Hard	Shallow	Shallow_hard	NIS	25.226	31.2	Steinhardt Museum of Natural History TAU 54630, Shiqmona
26	B208	Bivalvia	Malleidae	Malleus	regula	(Forsskål in Niebuhr, 1775)	130	Hard	Shallow	Shallow_hard	NIS	17.638	55	Barash & Danin, 1992
115	B227	Bivalvia	Veneridae	Costellipitar	chordatus	(Römer, 1867)	41	Soft	Shallow	Shallow_soft	NIS	6.234	5.605	our measurements
117	B321	Bivalvia	Lasaeidae	Hemilepton	nitidum	(W. Turton, 1822)	11	Soft	Shallow	Shallow_soft	Native	1.751	3	Cachia et al, 2004
29	B481	Bivalvia	Mytilidae	Musculus	aff viridulus	(H. Adams, 1871)	50	Hard	Shallow	Shallow_hard	NIS	4.558	10	Oliver, 1992
33	G002	Gastropoda	Cerithiidae	Rhinoclavis	kochi	(Philippi, 1848)	22	Hard	Shallow	Shallow_hard	NIS	15.143	27	Barash & Danin, 1972
122	G003	Gastropoda	Pyramidellidae	Odostomia	lorioli	(Hornung & Mermod, 1924)	10	Soft	Shallow	Shallow_soft	NIS	2.558	4	van Aartsen et al, 1989
123	G004	Gastropoda	Pyramidellidae	Syrnola	fasciata	Jickeli, 1882	23	Soft	Shallow	Shallow_soft	NIS	7.32	5	van Aartsen et al, 1989
124	G005	Gastropoda	Cerithiidae	Varicopeza	pauxilla	(A. Adams, 1855)	185	Soft	Shallow	Shallow_soft	NIS	11.27	8.6	Steger et al, 2018
126	G007	Gastropoda	Retusidae	Pyrunculus	fourierii	(Audouin, 1826)	49	Soft	Shallow	Shallow_soft	NIS	2.365	4	Bogi & Galil 2002
34	G007	Gastropoda	Retusidae	Pyrunculus	fourierii	(Audouin, 1826)	80	Hard	Shallow	Shallow_hard	NIS	3.243	4	Bogi & Galil 2002
35	G008	Gastropoda	Pyramidellidae	Pyrgulina	pupaeformis	(Souverbie, 1865)	179	Hard	Shallow	Shallow_hard	NIS	3.663	4.5	Nordsieck, 1972 (as Dunkeria scalaris dentata)
129	G010	Gastropoda	Pyramidellidae	Parthenina	interstincta	(J. Adams, 1797)	20	Soft	Shallow	Shallow_soft	Native	2.227	3	Cachia et al, 2001
130	G012	Gastropoda	Tornatinidae	Acteocina	mucronata	(Philippi, 1849)	28	Soft	Shallow	Shallow_soft	NIS	3.171	2	van Aartsen et al, 1990
132	G017	Gastropoda	Cerithiidae	Bittium	latreillii	(Payraudeau, 1826)	16	Soft	Shallow	Shallow_soft	Native	5.326	16	Cachia et al 1996
38	G017	Gastropoda	Cerithiidae	Bittium	latreillii	(Payraudeau, 1826)	31	Hard	Shallow	Shallow_hard	Native	9.466	16	Cachia et al 1996
39	G018	Gastropoda	Pyramidellidae	Cingulina	isseli	(Tyron, 1886)	80	Hard	Shallow	Shallow_hard	NIS	2.443	3	van Aartsen & Carrozza, 1983
134	G020	Gastropoda	Ringiculidae	Ringicula	auriculata	(Ménard de la Groye, 1811)	40	Soft	Shallow	Shallow_soft	Native	3.402	5	Cachia et al, 2001
40	G027	Gastropoda	Pyramidellidae	Megastomia	conoidea	(Brocchi, 1814)	83	Hard	Shallow	Shallow_hard	Native	2.212	7	Cachia et al, 2001
41	G029	Gastropoda	Retusidae	Cylichnina	crebrisculpta	Monterosato, 1884	48	Hard	Shallow	Shallow_hard	Native	1.864	3	Cachia et al, 2001
43	G050	Gastropoda	Rissoidae	Pusillina	philippi	(Aradas & Maggiore, 1844)	76	Hard	Shallow	Shallow_hard	Native	2.454	2.5	Cachia et al 1996
139	G081	Gastropoda	Trochidae	Pseudominolia	nedyma	(Melvill, 1897)	12	Soft	Shallow	Shallow_soft	NIS	3.319	7	Nordsieck, 1972
44	G085	Gastropoda	Conradiidae	Conradia	eutornisca	(Melvill, 1918)	33	Hard	Shallow	Shallow_hard	NIS	2.025	1.71	Buzzurro & Cecalupo, 2006
140	G089	Gastropoda	Strombidae	Conomurex	persicus	(Swainson, 1821)	10	Soft	Shallow	Shallow_soft	NIS	32.008	55.2	Barash & Danin, 1986
45	G089	Gastropoda	Strombidae	Conomurex	persicus	(Swainson, 1821)	38	Hard	Shallow	Shallow_hard	NIS	12.551	55.2	Barash & Danin, 1986
46	G102	Gastropoda	Cerithiidae	Cerithium	scabridum	Philippi, 1848	96	Hard	Shallow	Shallow_hard	NIS	16.057	15	Nordsieck, 1972
47	G128	Gastropoda	Cerithiidae	Cerithidium	perparvulum	(Watson, 1886)	143	Hard	Shallow	Shallow_hard	NIS	2.925	3	van Aartsen, 2006
48	G133	Gastropoda	Rissoinidae	Rissoina	bertholleti	Issel, 1869	80	Hard	Shallow	Shallow_hard	NIS	8.186	7	Nordsieck, 1972
157	G138	Gastropoda	Littorinidae	Melaraphe	neritoides	(Linnaeus, 1758)	52	Hard	Intertidal	Intertidal_hard	Native	5.764	10	Cachia et al, 2001
50	G149	Gastropoda	Pyramidellidae	Oscilla	jocosa	Melvill, 1904	51	Hard	Shallow	Shallow_hard	NIS	2.241	2.4	van Aartsen et al, 1989
51	G153	Gastropoda	Siphonariidae	Williamia	gussoni	(Costa O.G., 1829)	31	Hard	Shallow	Shallow_hard	Native	2.55	8	Cachia et al, 2001
53	G206	Gastropoda	Columbellidae	Zafra	selasphora	(Melvill & Standen, 1901)	168	Hard	Shallow	Shallow_hard	NIS	3.994	3.3	Giannuzzi-Savelli et al, 2003 (as Anachis troglodytes)
57	G246	Gastropoda	Cerithiopsidae	Cerithiopsis	pulvis	(Issel, 1869)	38	Hard	Shallow	Shallow_hard	NIS	3.702	4	van Aartsen & Carrozza, 1983
58	G247	Gastropoda	Cerithiopsidae	Cerithiopsis	tenthrenois	(Melvill, 1896)	48	Hard	Shallow	Shallow_hard	NIS	2.56	2	van Aartsen et al, 1989
59	G254	Gastropoda	Eulimidae	Sticteulima	lentiginosa	(A. Adams, 1861)	199	Hard	Shallow	Shallow_hard	NIS	2.404	2.5	Giannuzzi-Savelli et al, 1999
64	G338	Gastropoda	Haminoeidae	Atys	jeffreysi	(Weinkauff, 1866)	18	Hard	Shallow	Shallow_hard	Native	3.337	8	Cachia et al, 2001
65	G352	Gastropoda	Triphoridae	Viriola	bayani	Jousseaume, 1884	16	Hard	Shallow	Shallow_hard	NIS	11.625	11.9	Steger et al, 2018
66	G354	Gastropoda	Pyramidellidae	Turbonilla	edgarii	(Melvill, 1896)	75	Hard	Shallow	Shallow_hard	NIS	2.433	2.9	van Aartsen et al, 1989
67	G390	Gastropoda	Dialidae	Diala	semistriata	(Philippi, 1849)	107	Hard	Shallow	Shallow_hard	NIS	4.141	2.4	Giannuzzi-Savelli et al, 1997 (as Diala varia)
68	G400	Gastropoda	Triphoridae	Metaxia	bacillum	(Issel, 1869)	15	Hard	Shallow	Shallow_hard	NIS	4.793	3	Issel, 1869 (original description)
71	G543	Gastropoda	Mnestiidae	Mnestia	girardi	(Audouin, 1826)	18	Hard	Shallow	Shallow_hard	NIS	2.23	3.2	Mienis 1976
72	G550	Gastropoda	Pyramidellidae	Oscilla	galilae	Bogi, Karhan & Yokeş, 2012	84	Hard	Shallow	Shallow_hard	NIS	1.609	1.4	Bogi et al, 2012
158	G564	Gastropoda	Littorinidae	Echinolittorina	punctata	(Gmelin, 1791)	164	Hard	Intertidal	Intertidal_hard	Native	9.586	14	Cachia et al, 2001
77	G814	Gastropoda	Cerithiopsidae	Cerithiopsis	ladae	Prkic & Buzzurro, 2007	43	Hard	Shallow	Shallow_hard	Native	2.146	2.1	Cachia et al, 2001
78	G815	Gastropoda	Pyramidellidae	Turbonilla	cangeyrani	Ovalis & Mifsud, 2017	214	Hard	Shallow	Shallow_hard	NIS	3.094	2.8	Scaperrotta et al, 2019
79	G816	Gastropoda	Eulimidae	Sticteulima	clandestina	Mifsud & Ovalis 2019	56	Hard	Shallow	Shallow_hard	NIS	2.995	2.1	Mifsud & Ovalis 2019 (holotype)
92	B005	Bivalvia	Semelidae	Abra	alba	(W. Wood, 1802)	220	Soft	Shallow	Shallow_soft	Native	9.067	12	Cachia et al, 2004
121	G002	Gastropoda	Cerithiidae	Rhinoclavis	kochi	(Philippi, 1848)	360	Soft	Shallow	Shallow_soft	NIS	12.527	27	Barash & Danin, 1972
128	G009	Gastropoda	Cerithiidae	Cerithidium	diplax	(Watson, 1886)	379	Soft	Shallow	Shallow_soft	NIS	3.223	2.5	van Aartsen, 2006
120	G001	Gastropoda	Scaliolidae	Finella	pupoides	A. Adams, 1860	406	Soft	Shallow	Shallow_soft	NIS	3.318	3.5	Barash & Danin 1992
152	G381	Gastropoda	Nacellidae	Cellana	rota	(Gmelin, 1791)	472	Hard	Intertidal	Intertidal_hard	NIS	41.31	45	Powell, 1973
91	B004	Bivalvia	Corbulidae	Corbula	gibba	(Olivi, 1792)	629	Soft	Shallow	Shallow_soft	Native	7.623	10	Cachia et al, 2004
153	G451	Gastropoda	Patellidae	Patella	caerulea	Linnaeus, 1758	1119	Hard	Intertidal	Intertidal_hard	Native	45.02	60	Cachia et al, 1991

## Sheet: Literature
Native biodiversity collapse in the Eastern Mediterranean
Size data and literature references
Paolo G. Albano1, Jan Steger1, Marija Bošnjak1,2, Beata Dunne1, Zara Guifarro1, Elina Turapova1, Quan Hua3, Darrell S. Kaufman4, Gil Rilov5, Martin Zuschin1
1 Department of Paleontology, University of Vienna, Althanstrasse 14, 1090 Vienna, Austria
2 Croatian Natural History Museum, Demetrova 1, Zagreb, Croatia
3 Australian Nuclear Science and Technology Organisation, Kirrawee DC, NSW 2232, Australia
4 School of Earth and Sustainability, Northern Arizona University, Flagstaff, Arizona 86011 USA
5 National Institute of Oceanography, Israel Oceanographic and Limnological Research (IOLR), Haifa 3108001, Israel
Barash A. & Danin Z.	1992	Annotated list of Mediterranean molluscs of Israel and Sinai.	The Israel Academy of Sciences and Humanities	pp. 405
Barash A. & Danin Z.	1972	Contributions to the knowledge of Suez Canal migration. The Indo-Pacific species of Mollusca in the Mediterranean and notes on a collection from the Suez Canal.	Israel Journal of Zoology	21: 301-374
Barash A. & Danin Z.	1986	Further additions to the knowledge of Indo-Pacific Mollusca in the Mediterranean Sea.	Spixiana	9 (2): 117-141
Bogi C. & Galil B.S.	2002	Retusa desgenettii (Audouin, 1826) lungo le coste israeliane.	La Conchiglia	34 (305): 11-13
Bogi C. & Galil B.S.	1999	Nuovi ritrovamenti di immigranti lessepsiani lungo le coste israeliane.	La Conchiglia	31 (292): 29-32
Bogi C., Karhan S.U., Yokes M.B.	2012	Oscilla galilae a new species of Pyramidellidae (Mollusca, Gastropoda, Heterobranchia) from the Eastern Mediterranean.	Iberus	30 (2): 1-6
Buzzurro G. & Cecalupo A.	2006	I molluschi lessepsiani di Tasucu (Turchia sud-orientale): descrizione di Parviturbo dibellai n. sp. (Gastropoda: Trochoidea: Skeneidae).	Bollettino Malacologico	42 (1-4): 27-32
Cachia C., Mifsud C., Sammut P.M.	1991	The marine shelled Mollusca of the Maltese Islands. (Part one: Archaeogastropoda).	Grima Printing & Publishing Industries, Malta	pp. XII-112
Cachia C., Mifsud C., Sammut P.M.	1996	The marine shelled Mollusca of the Maltese Islands. (Part two: Neotaenioglossa).	Backhuys Publishers, Leiden	pp. 228
Cachia C., Mifsud C., Sammut P.M.	2001	The marine Mollusca of the Maltese Islands. Part Three: subclass Prosobranchia to subclass Pulmonata, order Basommatophora.	Backhuys Publishers, Leiden	pp. 266
Cachia C., Mifsud C., Sammut P.M.	2004	The marine Mollusca of the Maltese Islands. Part Four: the classes: Caudofoveata, Solenogastres, Bivalvia, Scaphopoda & Cephalopoda.	Backhuys Publishers, Leiden	pp. 263
Giannuzzi-Savelli R., Pusateri F., Palmeri A., Ebreo C.	1997	Atlante delle conchiglie marine del Mediterraneo. Vol. II (Caenogastropoda parte 1: Discopoda - Heteropoda).	Edizioni de "La Conchiglia", Roma	pp. 258
Giannuzzi-Savelli R., Pusateri F., Palmeri A., Ebreo C.	1999	Atlante delle conchiglie marine del Mediterraneo. Vol. III (Caenogastropoda parte 2: Ptenoglossa).	Edizioni de "La Conchiglia", Roma	pp. 127
Giannuzzi-Savelli R., Pusateri F., Palmeri A., Ebreo C., Coppini M., Margelli A., Bogi C.	2003	Atlante delle conchiglie marine del Mediterraneo. Vol. IV parte 1a (Neogastropoda: Muricoidea).	Edizioni Evolver, Roma	pp. 298
Issel A.	1869	Malacologia del Mar Rosso. Ricerche zoologiche e paleontologiche.	Biblioteca Malacologica	pp. xi+387
Mienis H.K.	1976	Ventomnestia girardi (Audouin, 1827) from the Mediterranean.	Conchiglie	12 (9-10): 209-210
Mienis H.K.	2002	Marine molluscs from the Eastern Mediterranean. 7. Confirmation of the presence of Mactra lilacea. [in Dutch]	Spirula	325:22
Mifsud C. & Ovalis P.	2019	Two new species of Sticteulima Laseron, 1955 (Gastropoda: Eulimidae) from Turkey, eastern Mediterranean	Bollettino Malacologico	55 (1): 68-71
Nordsieck F.	1972	Marine Gastropoden aus der Shiqmona-Bucht in Israel.	Archive für Molluskenkunde	102 (4-6): 227-245
Oliver P.G.	1992	Bivalved seashells of the Red Sea.	Darmstadt, Verlag Christa Hemmen and National Museum of Wales	pp. 330
Powell A.W.B.	1973	The patellid limpets of the world (Patellidae).	Indo-Pacific Mollusca	3 (15): 75-206
Scaperrotta M., Bartolini S., Bogi C.	2019	Accrescimenti. Stadi di accrescimento dei molluschi marini del Mediterraneo. Volume X.	L'Informatore Piceno	pp. 212
Steger J., Stockinger M., Ivkic A., Galil B.S., Albano P.G.	2018	New records of non-indigenous molluscs from the eastern Mediterranean Sea.	Bioinvasions Records	7 (3): 245-257
van Aartsen J.J. & Carrozza F.	1983	Two more Red Sea species recorded for the first time from the Mediterranean coast of Israel.	Bollettino Malacologico	19 (1-4): 37-40
van Aartsen J.J., Barash Al., Carrozza F.	1989	Addition to the knowledge of the Mediterranean Mollusca of Israel and Sinai.	Bollettino Malacologico	25 (1-4): 63-76
van Aartsen J.J., Carrozza F., Lindner G.	1990	Acteocina mucronata (Philippi, 1849), a recent Red Sea immigrant species in the Eastern Mediterranean.	Bollettino Malacologico	25: 285-288
van Aartsen J.J., Galil B., Bogi C.	2015	Two alien venerid bivalves from the Eastern Mediterranean.	Marine Biodiversity Records	8: e83
van Aartsen J.J.	2006	Indo-Pacific migrants into the Mediterranean. 4. Cerithidium diplax (Watson, 1886) and Cerithidiu perparvulum (Watson, 1886) (Gastropoda, Caenogastropoda).	Basteria	70: 33-39
